# Supplementary material
Source: PubMed Central journal article supplement (PMC3786144)
Supplement: NIHMS515175-supplement-01.pdf [file NIHMS515175-supplement-01.pdf]

## **Supplemental Material**

### **Methods**

#### **Cell line.**

SRF shRNA 2-2 cell line was generated by stable transfection of NIH3T3 with pLKO.1

containing short hairpin RNA (shRNA) directed to SRF; shSRF-2, 5' –

GAUGGAGUUCAUCGACAACAA -3' ; NIH3T3 cells were used as the control cell line. The

lentiviruses were made in Phoenix-ECO cells (ATCC CRL3214). Cells were grown in 5% CO<sub>2</sub>

Dulbecco's modified Eagle's medium (DMEM) containing 10% New Born Calf serum (NCS)

and 10 µg/ml puromycin (Invivogen). NIH3T3 cells were grown in 5% CO<sub>2</sub> in DMEM

supplemented with 10% NCS.

### **Figure Legend**

#### **Figure S1. Effect of SRF depletion on IEG expression.**

Control and SRF knockdown cells were starved in 0.2% NCS overnight and then serum induced with 20% NCS for 0, 30, 60 or 120 minutes. Total RNA was isolated from the cells. The levels of the indicated genes were measured using quantitative real time-PCR (qPCR). 18s rRNA levels were used to normalize for overall RNA levels.

#### **Figure S2. Effect of C3 transferase of Id1 reporter gene expression.**

NIH3T3 cells were transfected with the indicated reporter genes along with pRLSV40P as an internal control. The next day transfected cells were starved in 0.2% serum overnight and then induced with 20% serum for four hours. As a control, the pGL3-promoter reporter containing the SV40 virus promoter was used. The Fos-pm18 reporter contains the c-fos SRE region with a

mutation in the TCF site, such that it is activated predominantly by the RhoA-MKL pathway [22, 80]. The Id1-1150 reporter is described in figure 3. Firefly luciferase levels were normalized to the Renilla pRLSV40P levels and are the means of three experiments +/- the standard deviation. \*\*\* indicates a p-value  $\leq 0.05$ .

**Figure S3. Protein synthesis-independent induction of Id1 expression.**

NIH3T3 cells were starved in 0.2% serum overnight, treated with or without cycloheximide (50  $\mu\text{g/ml}$ ) for 30 minutes and then treated with or without BMP2 (50  $\text{ng/ml}$ ) for 1 hour. The levels of Id1 mRNA were measured by qPCR with 18s rRNA levels used to normalize the samples. The values are the means of two experiments in duplicate +/- standard deviations.
