# Supplementary material
Source: PubMed Central journal article supplement (PMC3786144)
Supplement: NIHMS515175-supplement-05.pdf [file NIHMS515175-supplement-05.pdf]

| <b>Gene</b>                                | <b>Gene Symbol</b> | <b>Percent decrease at peak +/- standard deviation</b> | <b>SRF Dependant</b> |
|--------------------------------------------|--------------------|--------------------------------------------------------|----------------------|
| Early Growth Response 2                    | egr2               | 91.5 +/- 1.8                                           | Yes                  |
| Connective Tissue Growth Factor            | CTGF               | 90.2 +/- 2.0                                           | Yes                  |
| Vinculin                                   | vcl                | 89.1 +/- 4.3                                           | Yes                  |
| Nuclear hormone receptor 77                | nur77              | 87 +/- 4.0                                             | Yes                  |
| Thrombospondin                             | tbsp               | 80.1 +/- 17                                            | Yes                  |
| Heparin binding EGF like growth factor     | Hbegf              | 51.3 +/- 8.3                                           | Partial              |
| Early Growth Response-1                    | egr1               | 58.2 +/- 23.8                                          | Partial              |
| Nocturnin                                  | noc                | 39 +/- 40.3                                            | No                   |
| Leukemia inhibitory factor                 | LIF                | 28.0 +/- 14.7                                          | No                   |
| Mitogen inducible gene 6                   | mig6               | 16.7 +/- 42.5                                          | No                   |
| Cellular FBJ osteosarcoma oncogene         | c-fos              | 12.4 +/- 35.2                                          | No                   |
| Cytochrome c oxidase subunit II            | cox2               | -3.8 +/- 10.2                                          | No                   |
| Cysteine rich protein 61                   | cyr61              | -8.4 +/- 25.8                                          | No                   |
| Plasminogen activator inhibitor 1          | PAI-1              | -23 +/- 27.5                                           | No                   |
| Interleukin 6                              | il6                | -26.4 +/- 108.0                                        | No                   |
| Inhibitor of DNA binding/differentiation 3 | Id3                | -60.8 +/- 38.3                                         | No                   |
| Inhibitor of DNA Binding/Differentiation 1 | Id1                | -64.8 +/- 20.5                                         | No                   |
| Zinc finger protein 36                     | zfp36              | -75.9 +/- 154.1                                        | No                   |
| Epiregulin                                 | ereg               | -203.4 +/- 168.8                                       | No                   |

**Table S1. Effect of SRF depletion on serum induction of immediate early genes.**

The indicated IEGs were assayed as in figures 1 and S1. The average percent decreases at the peak time of induction +/- the standard deviation are shown. A decrease of greater than 50% was considered significant. Genes whose induction was changed less than 50% or increased in the SRF depleted cells were labeled as SRF independent. The final column indicates the SRF dependence.
