# Supplementary material
Source: PubMed Central journal article supplement (PMC3786144)
Supplement: NIHMS515175-supplement-06.pdf [file NIHMS515175-supplement-06.pdf]

| <b>Mouse Genes</b>                         | <b>Gene Symbol</b> | <b>5' Primer</b>          | <b>3' Primer</b>         |
|--------------------------------------------|--------------------|---------------------------|--------------------------|
| Cellular FBJ osteosarcoma oncogene (c-fos) | c-fos              | AGCATGGGCTCTCCTGTCAAC     | GCCACGGAGGAGACCAGAGT     |
| Connective Tissue Growth Factor            | CTGF               | AACCGCAAGATTGGAGTGTGC     | GGTATTTGCAGCTGCTTTGGAAGG |
| Cysteine Rich protein 61                   | cyr61              | TCCACCGCTCTGAAAGGGATCT    | TGGTGTTTACAGTTGGGCTGGAAG |
| Cytochrome c oxidase subunit II            | cox2               | GGCAGCAAATCCTTGCTGTCCAA   | TCACCATAGAATCCAGTCCGGGTA |
| Early growth response-1                    | egr1               | AACAACCCTATGAGCACCTGACCA  | ATAACTCGTCTCCACCATCGCCTT |
| Early growth response 2                    | egr2               | TTTGACCAGATGAACGGAGTGGC   | AGGTCTGGTTTCTAGGTGCAGAGA |
| Epiregulin                                 | ereg               | GTTTCTCATCATAACCGCTGGA    | GTCCGTAACCTGATGGCACTG    |
| Heparin binding EGF like growth factor     | Hbegf              | AAGAGAGACCCATGCCTCAGGAAA  | ACTGGTAGAGTCAGCCCATGACA  |
| Inhibitor of DNA binding/differentiation 1 | Id1                | AACGGCGAGATCAGTGCCTT      | CCTCAGCGACACAAGATGCGAT   |
| Inhibitor of DNA binding/differentiation   | Id3                | ACCTTCAGGTGGTCCTGGCA      | AGCTCCTCTGTCTTGGAGATCA   |
| Interleukin 6                              | il6                | TCCAGTTGCCTTCTTGGGACTGAT  | AAGTCTCCTCTCCGGACTTGTGAA |
| Leukemia inhibitory factor                 | LIF                | TCAGCGACAAAGTTACTCCACCGT  | AAGTGATGACAAAGCCCAACAGGC |
| Mitogen inducible gene 6                   | mig6               | ACCATGGCCTACAATCTGAACTCC  | TTGACCTTGAGATGGACCACACT  |
| Nocturnin                                  | noc                | TTCGCGTCATGCAGTGGAAACAT   | TCAGGCACTTCTCTCTCCATT    |
| Nuclear hormone receptor 77                | nur77              | TCTGTGGTGACAATGCTTCGTGTC  | TCAGGCACTTCTCTCTCCATT    |
| Plasminogen activator inhibitor            | PAI                | AACAAGAGCCAATCACAAGGCACC  | TGAACCCTTTCCAGAGACCAGAA  |
| Serum Response Factor                      | SRF                | CAAGAGGAAGACGGGCATCA      | GCAACAGCACCTGTGTCCCT     |
| Thrombospondin                             | tbsp               | ACTAGGCCTGTTCTGTCTTCTCTCA | CGCTGGTTATGATTGGCAGCTGAT |
| Vinculin                                   | vcl                | GCCGGACCAACATCAGTGAT      | GCGCAGAGTAAAGCCAGCAT     |
| Zinc finger protein 36                     | zfp36              | ATTCGCGCCACCATGGATCT      | ACGGGATGGAGTCCGAGTTTATGT |
| 18s ribosomal RNA                          | 18s rRNA           | TCGAGGCCCTGTAATTGGAAT     | CCCTCCAATGGATCCTCGTTA    |
|                                            |                    |                           |                          |
| <b>Human Genes</b>                         | <b>Gene Symbol</b> | <b>5' Primer</b>          | <b>3' Primer</b>         |
| Inhibitor of DNA binding/differentiation 1 | Id1                | GTTCCATTTCCGTATCTGCTTC    | CCACTGGCGACTTTCATGAT     |

**Table S2. Nucleotide sequence of primers utilized for Q-PCR.**
