# Supplementary material
Source: PubMed Central journal article supplement (PMC3786144)

NIH 3T3  
shSRF-2-2

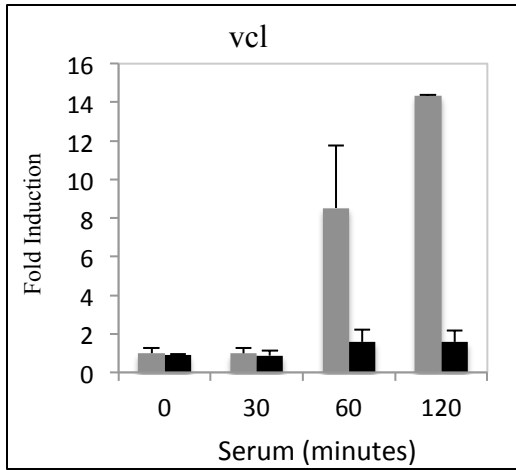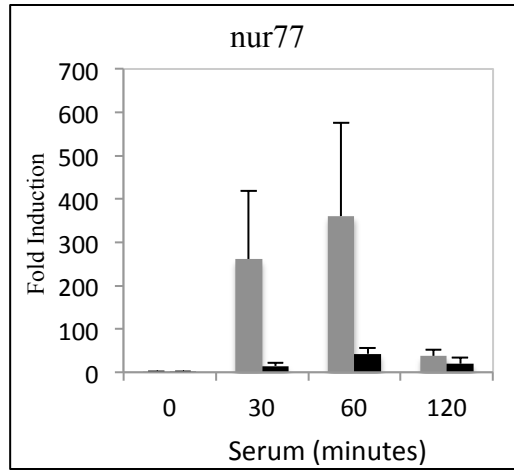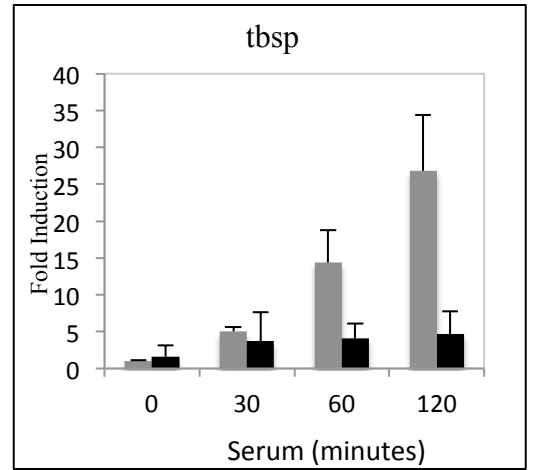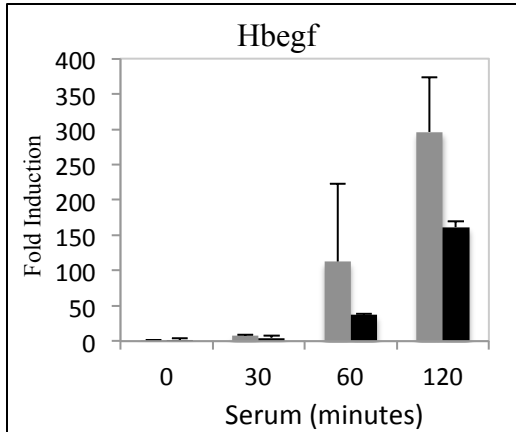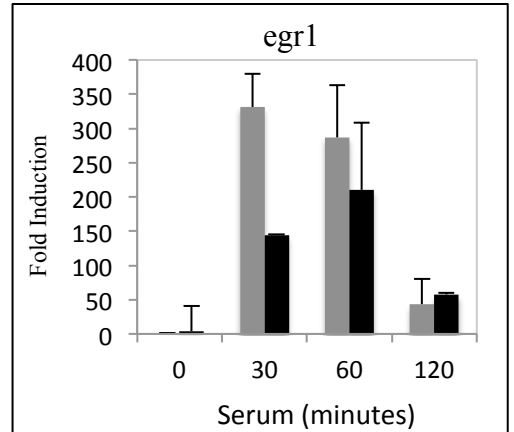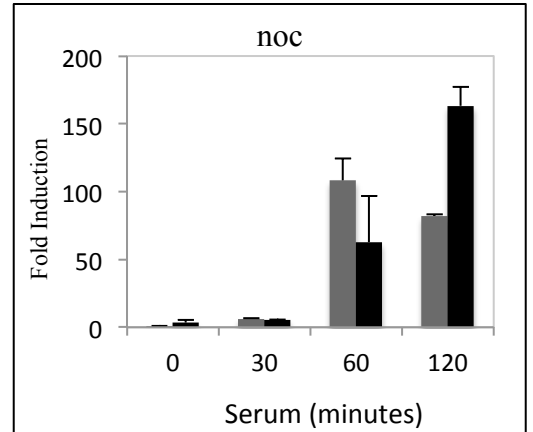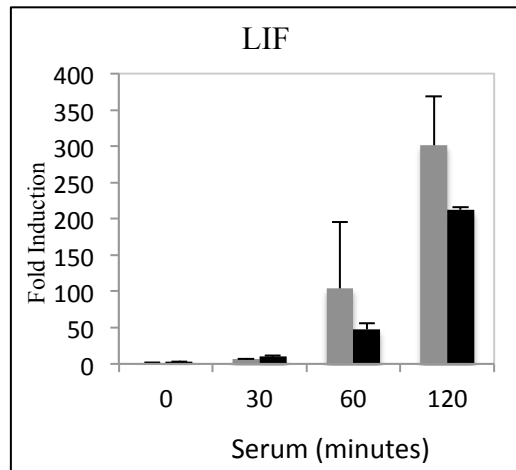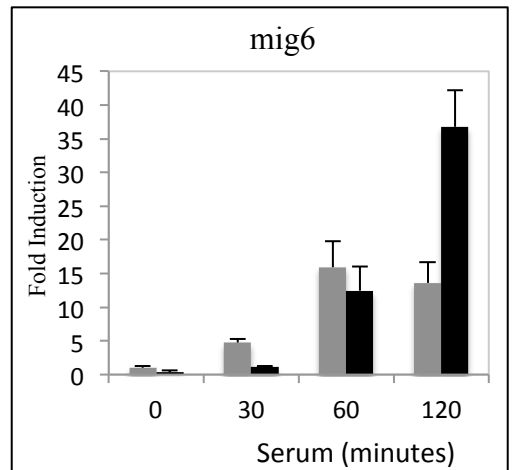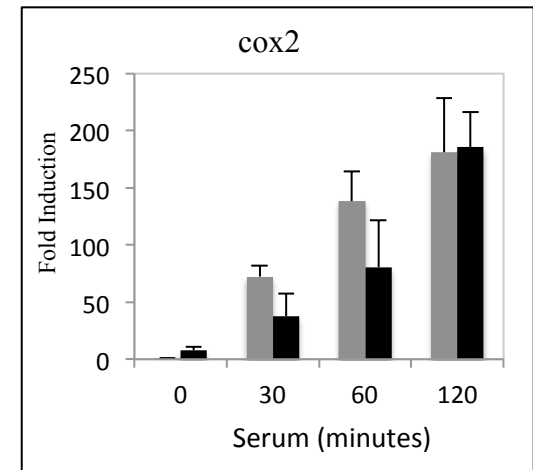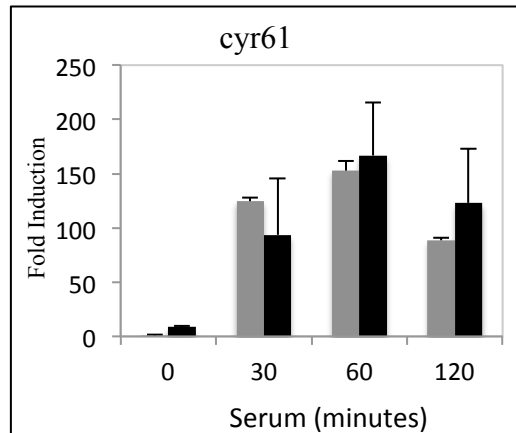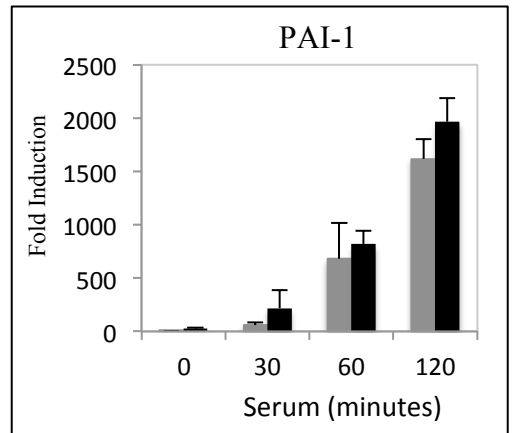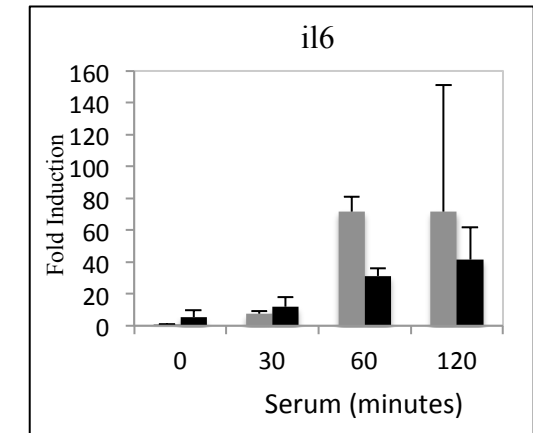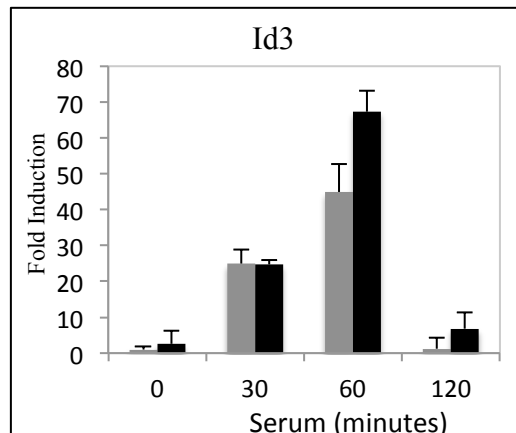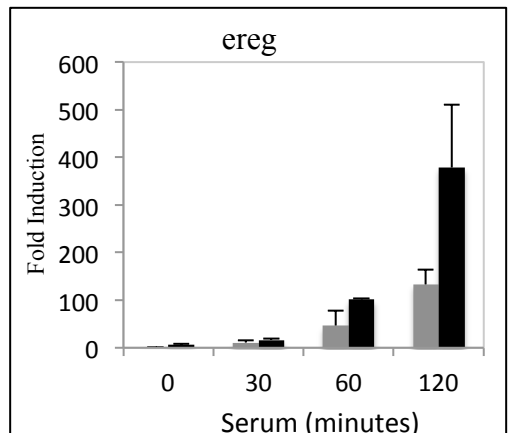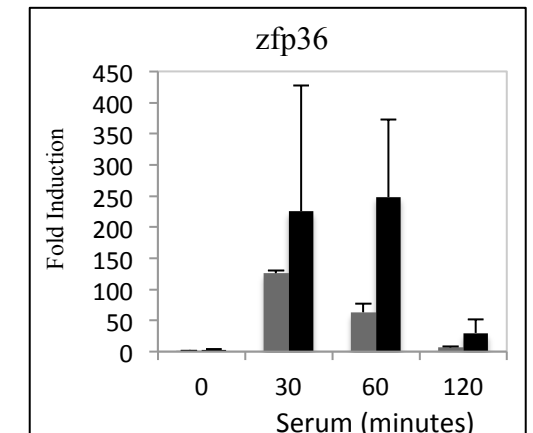

Supplement: NIHMS515175-supplement-02.pdf [file NIHMS515175-supplement-02.pdf]

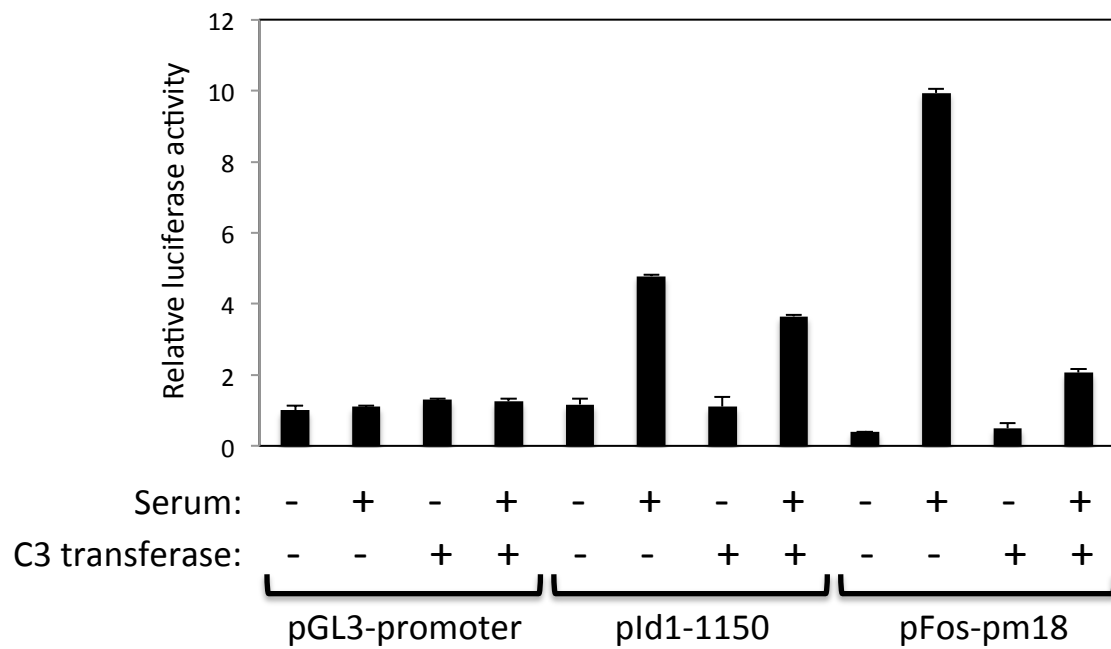

Supplement: NIHMS515175-supplement-03.pdf [file NIHMS515175-supplement-03.pdf]

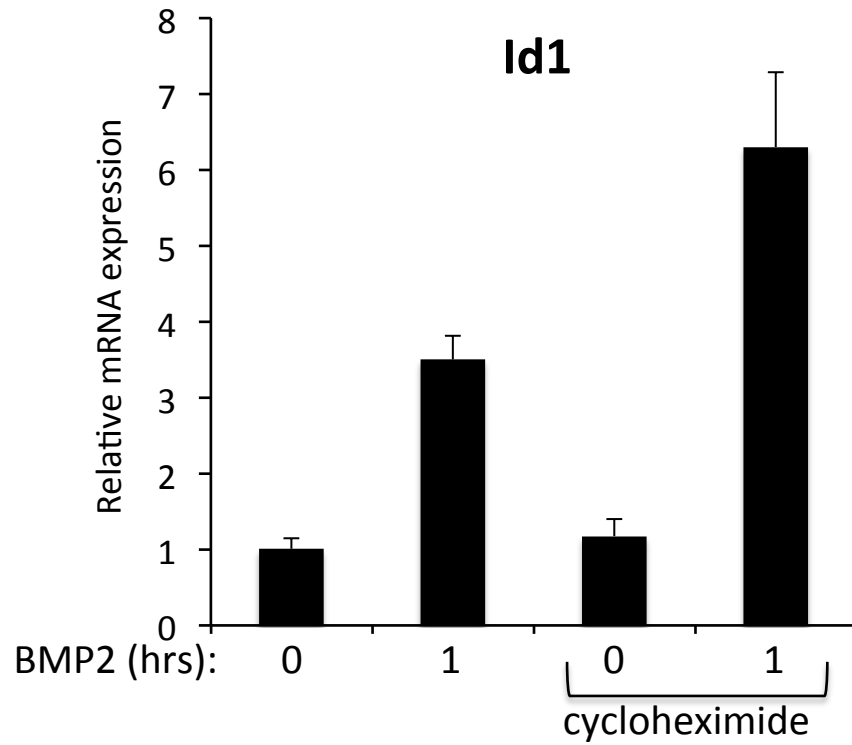

Supplement: NIHMS515175-supplement-04.pdf [file NIHMS515175-supplement-04.pdf]
